# Supplementary material
Source: MDPI journal article supplement (https://www.mdpi.com/2571-6255/4/2/28)
Supplement: s1 [file s1]

## Supplementary Materials S1

Broad-scale surface and atmospheric conditions during large fires in south-central Chile

David B. McWethy, René Garreaud, Andrés Holz, Gregory T. Pederson

**Figure S1. Comparison of monthly versus seasonal fire composites.** Active minus inactive monthly (panel a) and seasonal (panel b) composites of 850 hPa (about 1500 m ASL) air temperature (colors) and wind vectors (gray arrows). The largest arrows represent a wind speed difference of 4 ms<sup>-1</sup>. The letter H indicates the center of the anticyclonic anomaly, the curved black arrows indicate the area with marked east-erly anomalies and the white rectangle covers south-central Chile (Valparaíso to Los Ríos districts).

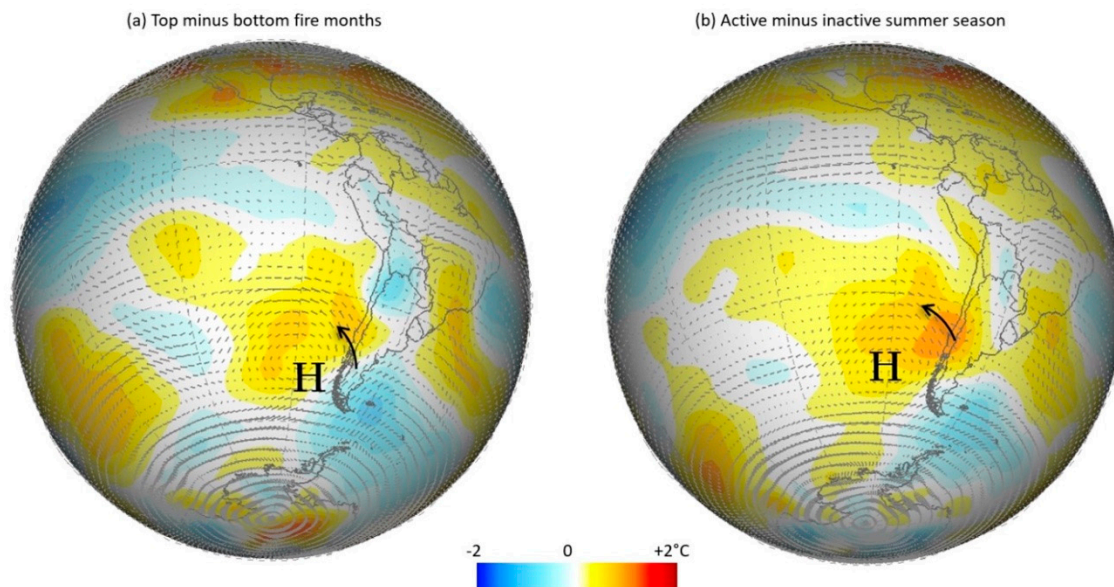

**Figure S2. Annual area burned (AAB) correlation matrix.** Correlation matrix showing Pearson correlations between annual area burned time series between regions. Regions are arranged geographically from north to south. Only significant ( $p < 0.05$ ) correlations plotted with stronger correlations in darker colors.

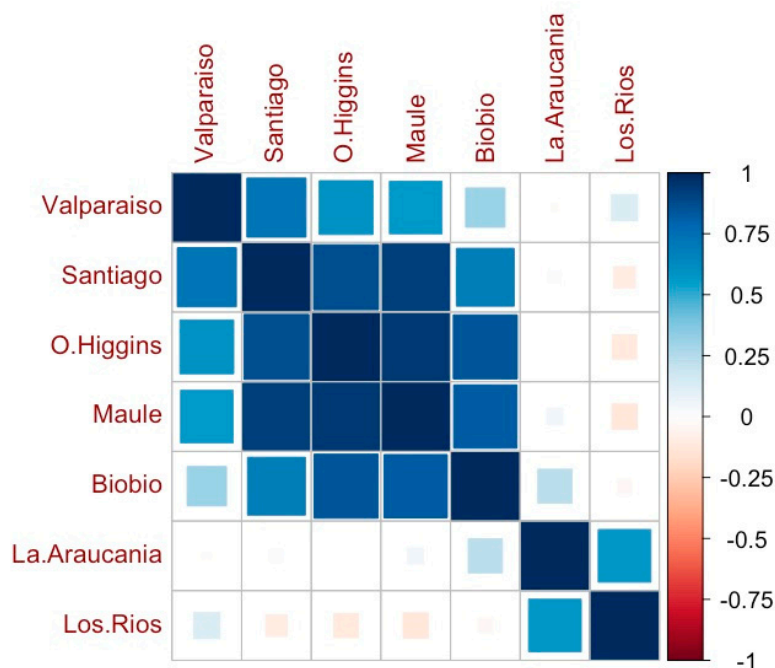

**Figure S3. Climate and annual area burned (AAB) time series.** Time series showing total area burned for central Chile (log scale, 1000 ha), summer mean temperature ( $^{\circ}\text{C}$ ), winter precipitation for central Chile (mm), and summer precipitation for southern Chile (mm).

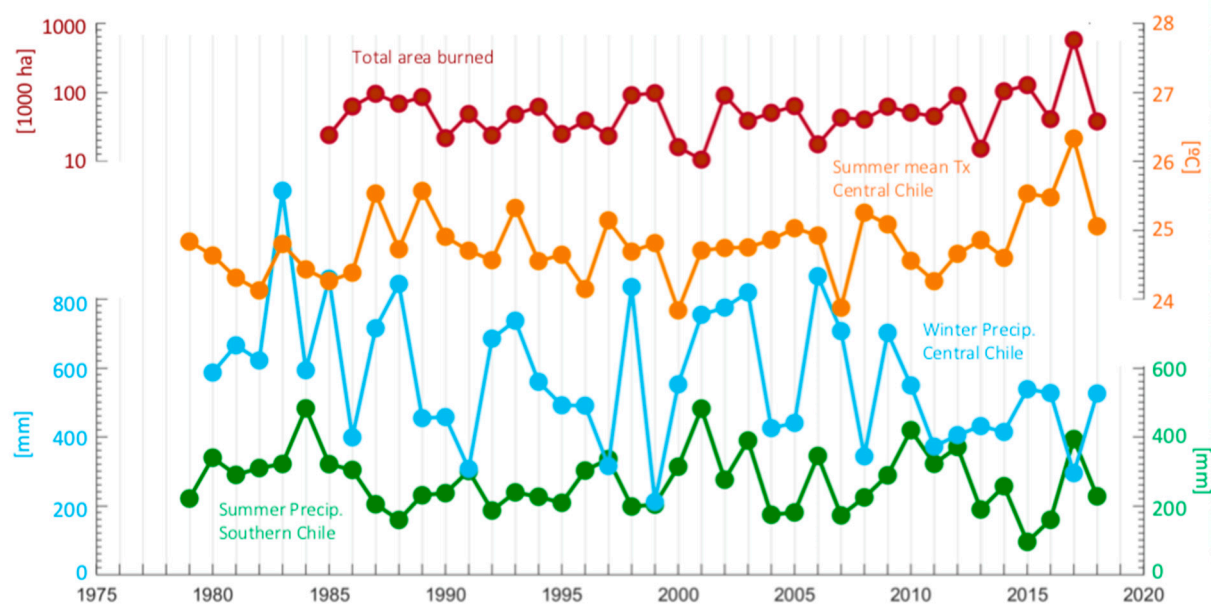

**Figure S4a. Annual area burned (AAB) trend analysis.** Parametric (ordinary least squares, OLS) and non-parametric (Theil–Sen) trend estimation for weighted mean fire area burned excluding the record-breaking 2016–2017 fire season (1984–2015) (Theil 1950, Sen 1968). Results are similar for total fire area burned but are not shown.

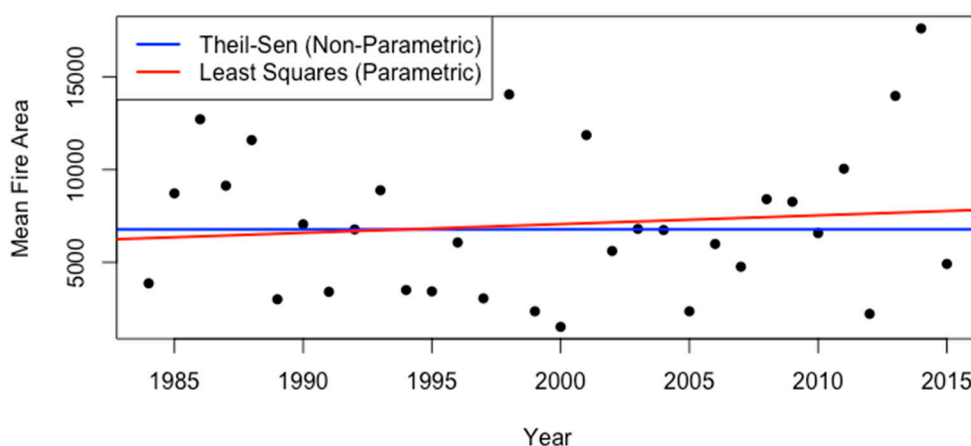

**Figure S4b. Annual area burned (AAB) trend analysis.** Parametric (OLS) and non-parametric (Theil–Sen) trend estimation for weighted mean fire area burned for the entire time series (1984–2017) (Theil 1950, Sen 1968). Results are similar for total fire area burned but are not shown.

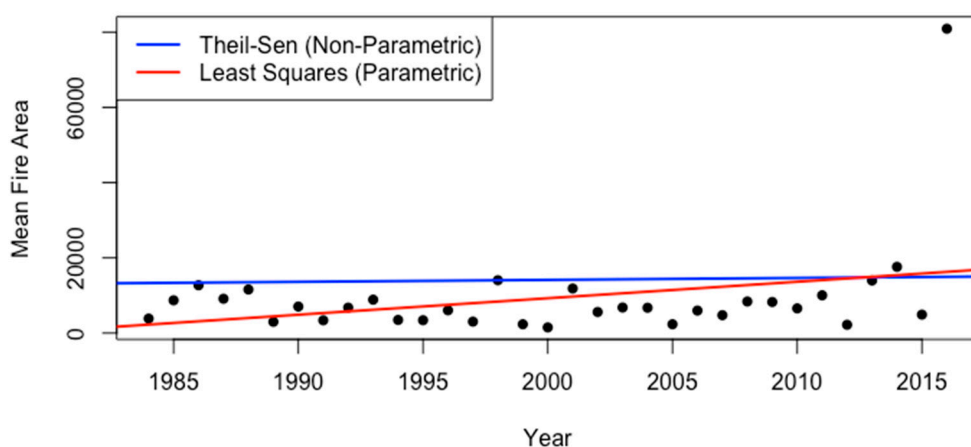

**Figure S5a-d. Active fire months and El Niño–Southern Oscillation (ENSO) and Southern Annular Mode (SAM) anomalies.** Departures (SDs) from mean values for monthly observed indices of ENSO (panels a,c) (MEI; (Wolter and Timlin 2011)) and SAM (panels b, d) (Marshall 2003) for a 2-month window ( $t - 2$  to  $t + 2$ ) centered on active (a, b) and passive (c, d) fire months for the entire study area ( $n = 20$  for active fire months,  $n = 20$  for passive fire months). Black bars indicate statistically significant (derived from 10,000 Monte Carlo simulations) departures ( $p < 0.1$ ). Note different scales of the y-axes.

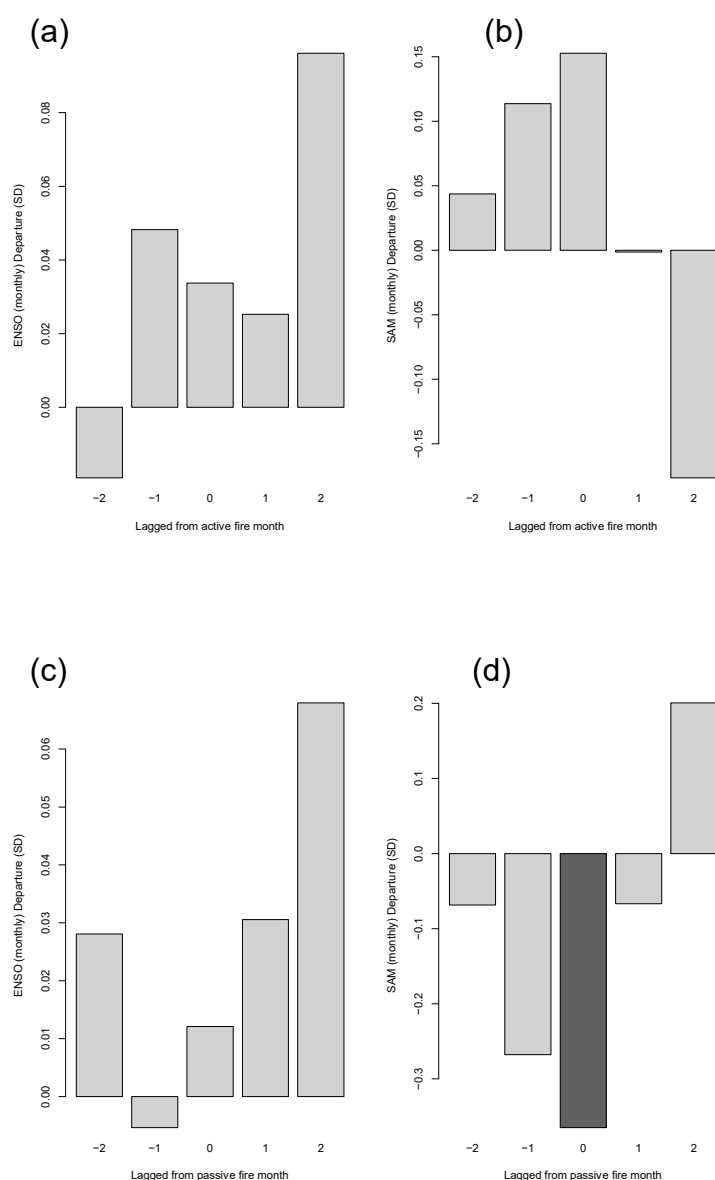

**Figure S6. Difference in atmospheric subsidence between active and inactive fire months.** Difference in the vertical velocity field (omega at the 500 hPa level) between active and inactive fire months.

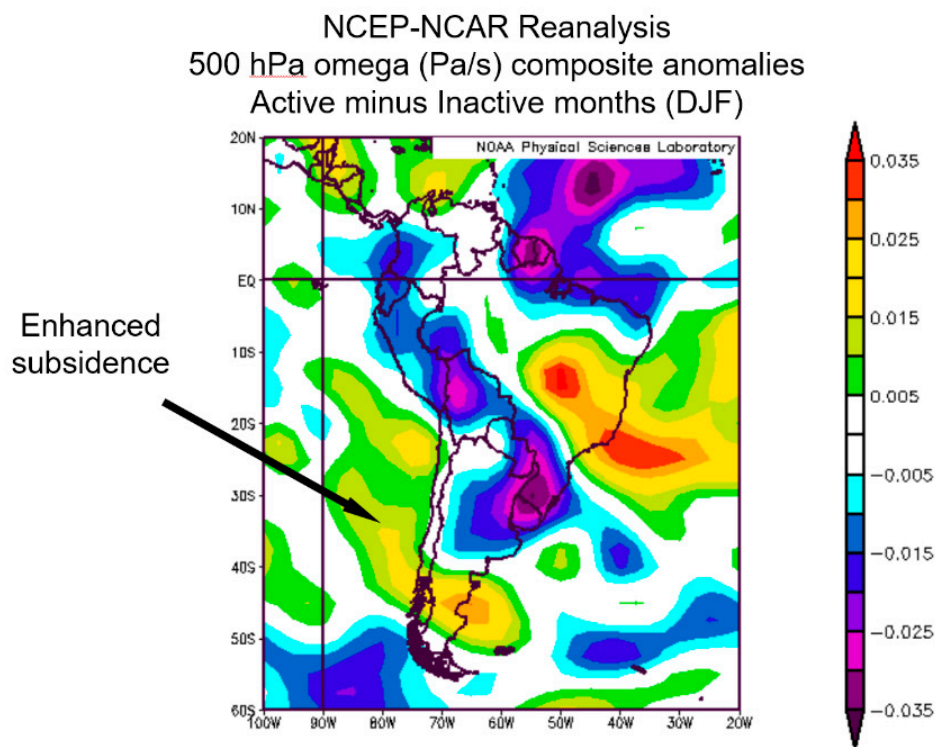

**Table S1. Fire season monthly area burned summary.** Summary of area burned by month for fire time series (1984–2001, top panel) and (2002–2018, bottom panel) from the Corporación Nacional Forestal of Chile (CONAF) fire dataset, all values in hectares (CONAF 2020). Red cells indicate active fire months and green cells indicate inactive fire months. FSAB = total fire season (Nov–Mar) area burned.

|          | Fire Year |        |        |        |        |        |        |        |        |        |        |        |        |        |        |        |        |
|----------|-----------|--------|--------|--------|--------|--------|--------|--------|--------|--------|--------|--------|--------|--------|--------|--------|--------|
|          | 84–85     | 85–86  | 86–87  | 87–88  | 88–89  | 89–90  | 90–91  | 91–92  | 92–93  | 93–94  | 94–95  | 95–96  | 96–97  | 97–98  | 98–99  | 99–00  | 00–01  |
| November | 637       | 883    | 270    | 1216   | 946    | 1231   | 822    | 271    | 2624   | 4470   | 1264   | 1383   | 2151   | 168    | 1503   | 1375   | 428    |
| December | 3814      | 10,133 | 2920   | 2746   | 8307   | 1418   | 7647   | 2013   | 4080   | 7116   | 5483   | 14221  | 1433   | 1065   | 6052   | 2809   | 1636   |
| January  | 6694      | 33,304 | 16,805 | 21,785 | 52,680 | 7533   | 6161   | 5272   | 16,763 | 22,840 | 5607   | 12,061 | 8027   | 11,187 | 34,813 | 7151   | 2824   |
| February | 7730      | 10,259 | 32,173 | 23,136 | 12,608 | 7044   | 29,758 | 12,963 | 19,491 | 14,521 | 4893   | 7777   | 6275   | 73,889 | 51,765 | 1813   | 2439   |
| March    | 4833      | 7101   | 42,036 | 18,780 | 9916   | 4241   | 3627   | 3091   | 4514   | 12163  | 7331   | 3084   | 5164   | 3622   | 2247   | 2723   | 3136   |
| FSAB     | 23,708    | 61,679 | 94,203 | 67,664 | 84,456 | 21,467 | 48,015 | 23,610 | 47,473 | 61,109 | 24,579 | 38,525 | 23,050 | 89,931 | 96,380 | 15,871 | 10,463 |

  

|          | Fire Year |        |        |        |        |        |        |        |        |        |        |        |         |         |        |         |        |
|----------|-----------|--------|--------|--------|--------|--------|--------|--------|--------|--------|--------|--------|---------|---------|--------|---------|--------|
|          | 01–02     | 02–03  | 03–04  | 04–05  | 05–06  | 06–07  | 07–08  | 08–09  | 09–10  | 10–11  | 11–12  | 12–13  | 13–14   | 14–15   | 15–16  | 16–17   | 17–18  |
| November | 1856      | 1754   | 2186   | 503    | 1273   | 537    | 1380   | 1549   | 911    | 791    | 1246   | 1156   | 2364    | 938     | 857    | 27,698  | 2310   |
| December | 9904      | 2896   | 11562  | 8929   | 3369   | 4815   | 2825   | 7100   | 16,522 | 12,354 | 49,544 | 2001   | 19,854  | 3573    | 3430   | 34,912  | 5036   |
| January  | 30,785    | 19,250 | 14,382 | 20,412 | 5040   | 31,864 | 11,505 | 32,206 | 26,159 | 9791   | 19,530 | 3983   | 68,285  | 36,359  | 6871   | 493,214 | 13,815 |
| February | 45,909    | 8782   | 18,446 | 29,228 | 5317   | 2652   | 17,422 | 10,266 | 3752   | 16,839 | 14,885 | 4280   | 4051    | 54,842  | 17,176 | 7954    | 10,246 |
| March    | 905       | 5530   | 3309   | 3316   | 2439   | 2492   | 6774   | 10,191 | 2765   | 4697   | 3301   | 3652   | 7768    | 30,085  | 12,183 | 3492    | 5997   |
| FSAB     | 89,359    | 38,212 | 49,884 | 62,388 | 17,439 | 42,361 | 39,907 | 61,312 | 50,109 | 44,472 | 88,505 | 15,072 | 102,322 | 125,796 | 40,516 | 567,270 | 37,404 |



## References Cited

- CONAF. 2020. Incendios forestales. Estadísticas históricas.
- Marshall, G. J. 2003. Trends in the Southern Annular Mode from Observations and Reanalyses. *Journal of Climate* **16**:4134-4143.
- Sen, P. K. 1968. Estimates of Regression Coefficient Based on Kendall's tau. *J. Am. Stat. Ass.* **63**:1379-1389.
- Theil, H. 1950. A rank invariant method for linear and polynomial regression analysis. *Nederl. Akad. Wetensch. Proc. Ser. A.* **53**:386-392 (Part I), 521-525 (Part II), 1397-1412 (Part III).
- Wolter, K., and M. S. Timlin. 2011. El Niño/Southern Oscillation behaviour since 1871 as diagnosed in an extended multivariate ENSO index (MEI.ext). *International Journal of Climatology* **31**:1074-1087.
